# Supplementary material for: Host traits and evolution shape key coral-bacterial symbioses
Source: Research Square preprint supplement (doi:10.21203/rs.3.rs-757354/v1), 2021-07-29
Supplement: Supplementary file 1 [file 044e354b23547ae8e6f1e20a.xlsx]

## Sheet: Sheet1
	Seawater ASVs %	Sediment ASVs %
Acropora aspera	19.5	11.9
Goniastreae retiformis	6.1	8.4
Goniopora tenuidens	8.2	9.6
Isopora palifera	14.4	10.9
Montipora digitata	15.7	10.3
Paragoniastrea australensis	4.3	6.2
Platygyra daedalea	5.5	8.3
Platygyra sinensis	4.3	6.2
Pocillopora damicornis	19.1	13.7
Porites annae	12.1	9.8
Porites lutea	8.1	10.5
Stylophora pistillata	17	10.5
