# Supplementary material for: Host traits and evolution shape key coral-bacterial symbioses
Source: Research Square preprint supplement (doi:10.21203/rs.3.rs-757354/v1), 2021-07-29
Supplement: Supplementary file 6 [file 0785d229fa991c00393be92f.xlsx]

## Sheet: Sheet1
	Tot ASVs N	rare ASVs	core ASVs	% rare ASVs	% core ASVs
Porites lutea tissue	426	396	30	92.9577	7.04225
Porites lutea skeleton	447	262	185	58.613	41.387
Paragoniastrea australensis tissue	202	174	28	86.1386	13.8614
Paragoniastrea australensis skeleton	431	280	151	64.9652	35.0348
Acropora aspera tissue	29	20	9	68.9655	31.0345
Acropora aspera skeleton	167	112	55	67.0659	32.9341
Montipora digitata tissue	410	321	89	78.2927	21.7073
Montipora digitata skeleton	131	98	33	74.8092	25.1908
Pocillopora damicornis tissue	77	54	23	70.1299	29.8701
Pocillopora damicornis skeleton	58	46	12	79.3103	20.6897
Porites annae tissue	140	68	62	48.5714	44.2857
Porites annae skeleton	161	120	41	74.5342	25.4658
Goniastrea retiformis tissue	1660	1257	403	75.7229	24.2771
Goniastrea retiformis skeleton	449	295	154	65.7016	34.2984
Stylophora pistillata tissue	103	77	26	74.7573	25.2427
Stylophora pistillata skeleton	121	84	37	69.4215	30.5785
Goniopora tenuidens tissue	267	206	61	77.1536	22.8464
Goniopora tenuidens skeleton	454	328	126	72.2467	27.7533
Platygyra sinensis tissue	396	301	95	76.0101	23.9899
Platygyra sinensis skeleton	1023	617	406	60.3128	39.6872
Platygyra daedalea tissue	575	410	165	71.3043	28.6957
Platygyra daedalea skeleton	536	401	135	74.8134	25.1866
Isopora palifera tissue	NA	NA	NA	NA	NA
Isopora palifera skeleton	74	57	17	77.027	22.973
