# Supplementary material for: Host traits and evolution shape key coral-bacterial symbioses
Source: Research Square preprint supplement (doi:10.21203/rs.3.rs-757354/v1), 2021-07-29
Supplement: Supplementary file 7 [file 880b07dd4e6687d21297eafb.xlsx]

## Sheet: core
Tissue ASVs	Domain	Phylum	Class	Order	Family	Genus	Species
d69c2fc094968fb97c66721aab11fad0	Bacteria	Proteobacteria	Gammaproteobacteria	Alteromonadales	Pseudoalteromonadaceae	Pseudoalteromonas
11d7cdd58868971f88fcfbccc3b805c9	Bacteria	Proteobacteria	Gammaproteobacteria	Betaproteobacteriales	Burkholderiaceae	Pelomonas	uncultured bacterium
81b8489be8496dcfcce0fb6b741dd8a7	Bacteria	Proteobacteria	Gammaproteobacteria	Vibrionales	Vibrionaceae	Vibrio
7f41dddc60f65fef0a1458cbd8a68957	Bacteria	Proteobacteria	Gammaproteobacteria	Enterobacteriales	Enterobacteriaceae	Serratia
c4471731c60a848a202d817c73d329ae	Bacteria	Proteobacteria	Gammaproteobacteria	Alteromonadales	Alteromonadaceae	Alteromonas
ab705c2ecbd8e150ecd9c2c58a9942be	Bacteria	Proteobacteria	Gammaproteobacteria	Steroidobacterales	Woeseiaceae	Woeseia
15ed4c83600cbd55f8938a8f480eeec5	Bacteria	Proteobacteria	Gammaproteobacteria	Alteromonadales	Alteromonadaceae	Alteromonas
068d074b1eae1cf2649009113d694b9f	Bacteria	Proteobacteria	Deltaproteobacteria	Myxococcales	Sandaracinaceae	uncultured	uncultured delta proteobacterium
93ffed2853662b571e798023b45989cf	Bacteria	Proteobacteria	Alphaproteobacteria	Rhizobiales	Xanthobacteraceae	Bradyrhizobium
79bc969db911f390f7009b5120666048	Bacteria	Firmicutes	Bacilli	Bacillales	Bacillaceae
9fecca368b214f6b009f74ac000bde33	Bacteria	Proteobacteria	Gammaproteobacteria	Betaproteobacteriales	Hydrogenophilaceae	Tepidiphilus	uncultured bacterium
d2caaf3bf2f90dd7529cec15045e6092	Bacteria	Proteobacteria	Gammaproteobacteria	Oceanospirillales	Endozoicomonadaceae	Endozoicomonas	uncultured bacterium
664a0f607cd00f776b186a9910c8af5a	Bacteria	Proteobacteria	Gammaproteobacteria	Cellvibrionales	Halieaceae	Halioglobus	uncultured bacterium
f49b1e5799e5c2e570de880c899b6a0a	Bacteria	Proteobacteria	Gammaproteobacteria	KI89A clade	uncultured bacterium
Skeleton ASVs	Domain	Phylum	Class	Order	Family	Genus	Species
6e21a6495ae21c417a61786acfd76ee4	Bacteria	Bacteroidetes	Bacteroidia	Cytophagales	Amoebophilaceae	Candidatus Amoebophilus	uncultured bacterium
abd1646354b746c64e87022a8dfb6588	Bacteria	Bacteroidetes	Bacteroidia	Cytophagales	Cyclobacteriaceae	Fulvivirga	uncultured bacterium
f6df60979e09c770b00cfc17b539b647	Bacteria	Firmicutes	Bacilli	Bacillales	Bacillaceae	Bacillus
79bc969db911f390f7009b5120666048	Bacteria	Firmicutes	Bacilli	Bacillales	Bacillaceae
0476005e06c732ae1f6cc297c3672fc3	Bacteria	Proteobacteria	Alphaproteobacteria	uncultured	uncultured bacterium
9fecca368b214f6b009f74ac000bde33	Bacteria	Proteobacteria	Gammaproteobacteria	Betaproteobacteriales	Hydrogenophilaceae	Tepidiphilus	uncultured bacterium
9b96a288e66b63a1420dd120fe5e109c	Bacteria	Proteobacteria	Gammaproteobacteria	Vibrionales	Vibrionaceae	Vibrio
c187a2dbe7bf65b9f6d6de0744468d4c	Bacteria	Proteobacteria	Alphaproteobacteria
0eec3e48e0824b6906054d4f31a0f837	Bacteria	Spirochaetes	Spirochaetia	Spirochaetales	Spirochaetaceae	Spirochaeta 2	uncultured organism
