# Supplementary material for: Host traits and evolution shape key coral-bacterial symbioses
Source: Research Square preprint supplement (doi:10.21203/rs.3.rs-757354/v1), 2021-07-29
Supplement: Supplementary file 8 [file e614b2f6369249d770e603f4.xlsx]

## Sheet: Sheet1
Tissue
Coral species	ASV identifier	ASVs nº	Phylum	Class	Order	Family	Genus	Species
Goniopora tenuidens	a063756e4f021f92f28826d5db4583c8	9	Proteobacteria	Gammaproteobacteria	Oceanospirillales	Endozoicomonadaceae	Endozoicomonas	uncultured bacterium
Goniopora tenuidens	bbabd31c1152d834861485c6b255d408	10	Proteobacteria	Gammaproteobacteria	Oceanospirillales	Endozoicomonadaceae	Endozoicomonas	uncultured bacterium
Isopora palifera	86ee3e76ea347225c3d8dad78dd1f198	5	Proteobacteria	Gammaproteobacteria	Alteromonadales	Pseudoalteromonadaceae	Algicola
Isopora palifera	c4471731c60a848a202d817c73d329ae	1	Proteobacteria	Gammaproteobacteria	Alteromonadales	Alteromonadaceae	Alteromonas
Isopora palifera	60c9658026c627d06ffa3a15e0bf0dc0	6	Proteobacteria	Gammaproteobacteria	Oceanospirillales	Halomonadaceae	Halomonas
Isopora palifera	6e9cc008312619cda19f14f6d0456731	7	Proteobacteria	Gammaproteobacteria	Alteromonadales	Idiomarinaceae	Idiomarina
Isopora palifera	67737ce166dc73a0feacc4bb1476a968	9	Proteobacteria	Deltaproteobacteria	Bdellovibrionales	Bacteriovoracaceae	Peredibacter
Isopora palifera	d69c2fc094968fb97c66721aab11fad0	2	Proteobacteria	Gammaproteobacteria	Alteromonadales	Pseudoalteromonadaceae	Pseudoalteromonas
Isopora palifera	b4c761d6776ca02ca23014c3d644e636	3	Proteobacteria	Gammaproteobacteria	Alteromonadales	Pseudoalteromonadaceae	Pseudoalteromonas
Isopora palifera	f96017a66ae00b9eaa8b07bb3b346b55	4	Proteobacteria	Gammaproteobacteria	Alteromonadales	Pseudoalteromonadaceae	Pseudoalteromonas
Isopora palifera	ba42cf15f4408a6b542dddc96a6adf22	8	Proteobacteria	Alphaproteobacteria	Rhodospirillales	Magnetospiraceae	uncultured
Montipora digitata	bf02380ab0bbf490ef0f37b37ad30ded	8	Proteobacteria	Gammaproteobacteria	Alteromonadales	Alteromonadaceae	Alteromonas
Montipora digitata	f5e6df5265c9057ed0a38da785b141b7	3	Proteobacteria	Gammaproteobacteria	Oceanospirillales	Endozoicomonadaceae	Endozoicomonas	uncultured bacterium
Montipora digitata	73d1d991952e86aafb9d539fdc985941	4	Proteobacteria	Gammaproteobacteria	Oceanospirillales	Endozoicomonadaceae	Endozoicomonas	uncultured bacterium
Montipora digitata	7f9f139fbc0fef3022a158c60cf4c38b	5	Proteobacteria	Gammaproteobacteria	Oceanospirillales	Endozoicomonadaceae	Endozoicomonas	uncultured bacterium
Montipora digitata	62b2663eea580e8f1d7c85612bd00a3d	7	Proteobacteria	Gammaproteobacteria	Oceanospirillales	Endozoicomonadaceae	Endozoicomonas	uncultured bacterium
Montipora digitata	d14fc810c6438c3250936d3f0aed62a2	6	Proteobacteria	Alphaproteobacteria	Rickettsiales	Midichloriaceae	MD3-55
Paragoniastreae australensis	2f7fd8b54944bdeca7594ec992a0038d	23	Epsilonbacteraeota	Campylobacteria	Campylobacterales	Campylobacteraceae	Campylobacter	uncultured bacterium
Paragoniastreae australensis	37964158e7e869f718d48b98456034a8	22	Proteobacteria	Gammaproteobacteria	Oceanospirillales	Endozoicomonadaceae	Endozoicomonas	uncultured bacterium
Paragoniastreae australensis	4e7722e997d75e471bd1568dd3cd4d80	24	Spirochaetes	Leptospirae	Leptospirales	Leptospiraceae	Leptospira
Paragoniastreae australensis	11d7cdd58868971f88fcfbccc3b805c9	25	Proteobacteria	Gammaproteobacteria	Betaproteobacteriales	Burkholderiaceae	Pelomonas	uncultured bacterium
Paragoniastreae australensis	7f41dddc60f65fef0a1458cbd8a68957	26	Proteobacteria	Gammaproteobacteria	Enterobacteriales	Enterobacteriaceae	Serratia
Platygyra daedalea	d08d9c73ef2804437c984a178088a2cd	11	Bacteroidetes	Bacteroidia	Flavobacteriales	Flavobacteriaceae	Actibacter
Platygyra daedalea	04c88965f29eff0182699b811b2ff368	44	Proteobacteria	Gammaproteobacteria	Alteromonadales	Alteromonadaceae	Alteromonas
Platygyra daedalea	c76d55ac76ad6e56548e55ebc1771545	47	Verrucomicrobia	Verrucomicrobiae	Chthoniobacterales	Chthoniobacteraceae	Chthoniobacter	uncultured bacterium
Platygyra daedalea	37964158e7e869f718d48b98456034a8	3	Proteobacteria	Gammaproteobacteria	Oceanospirillales	Endozoicomonadaceae	Endozoicomonas	uncultured bacterium
Platygyra daedalea	b5aa71bf93a260a50c2cc88cb4f73e6a	4	Proteobacteria	Gammaproteobacteria	Oceanospirillales	Endozoicomonadaceae	Endozoicomonas
Platygyra daedalea	a063756e4f021f92f28826d5db4583c8	7	Proteobacteria	Gammaproteobacteria	Oceanospirillales	Endozoicomonadaceae	Endozoicomonas	uncultured bacterium
Platygyra daedalea	664a0f607cd00f776b186a9910c8af5a	8	Proteobacteria	Gammaproteobacteria	Cellvibrionales	Halieaceae	Halioglobus	uncultured bacterium
Platygyra daedalea	3fadd4a0e1e2625e3441173bcffd6d36	34	Proteobacteria	Gammaproteobacteria	Oceanospirillales	Halomonadaceae	Halomonas
Platygyra daedalea	7a62f8fb30c311270c75cdf3336da669	33	Proteobacteria	Gammaproteobacteria	Alteromonadales	Idiomarinaceae	Idiomarina
Platygyra daedalea	751d23135aeb9314426f02983c941b39	32	Proteobacteria	Alphaproteobacteria	Rhizobiales	Stappiaceae	Labrenzia
Platygyra daedalea	76438d44de98e52493d0b8c912f80a5b	43	Bacteroidetes	Bacteroidia	Bacteroidales	Marinifilaceae	Marinifilum	uncultured bacterium
Platygyra daedalea	6e64607c3432956159fb1b628b6f8e55	48	Bacteroidetes	Bacteroidia	Cytophagales	Cyclobacteriaceae	Marivirga
Platygyra daedalea	0995a3e30d1d661e41d0f77344f4c8ce	9	Bacteroidetes	Bacteroidia	Flavobacteriales	Flavobacteriaceae	Mesonia
Platygyra daedalea	e1892f21adc69cde79c95a3141cd2cb3	21	Proteobacteria	Alphaproteobacteria	Rhizobiales	Methyloligellaceae	Methyloceanibacter	uncultured bacterium
Platygyra daedalea	df8f2c7edbe9f452b2a175069a7e3387	26	Proteobacteria	Gammaproteobacteria	Cellvibrionales	Halieaceae	OM60(NOR5) clade
Platygyra daedalea	a5bafc6e15e9e62b15a3d512b3efc080	6	Bacteroidetes	Bacteroidia	Chitinophagales	Saprospiraceae	Portibacter
Platygyra daedalea	f96017a66ae00b9eaa8b07bb3b346b55	20	Proteobacteria	Gammaproteobacteria	Alteromonadales	Pseudoalteromonadaceae	Pseudoalteromonas
Platygyra daedalea	b4c761d6776ca02ca23014c3d644e636	25	Proteobacteria	Gammaproteobacteria	Alteromonadales	Pseudoalteromonadaceae	Pseudoalteromonas
Platygyra daedalea	ff81d8d280826582440b80bc4a7d3181	31	Acidobacteria	Thermoanaerobaculia	Thermoanaerobaculales	Thermoanaerobaculaceae	Subgroup 10	uncultured bacterium
Platygyra daedalea	1d4e14a5cfc5be0e6ecebb36d3982d91	16	Bacteroidetes	Bacteroidia	Cytophagales	Cyclobacteriaceae	uncultured	uncultured bacterium
Platygyra daedalea	5f84f22b6e3903fa1beaf89abe213a1c	19	Bacteroidetes	Bacteroidia	Cytophagales	Cyclobacteriaceae	uncultured	uncultured bacterium
Platygyra daedalea	0d40b49d546452a7d053fa4c6c767c44	45	Bacteroidetes	Bacteroidia	Chitinophagales	Saprospiraceae	uncultured	uncultured bacterium
Platygyra daedalea	eed0ba4e29ed75c71ac34bd1b9fa93d3	14	Proteobacteria	Gammaproteobacteria	Thiohalorhabdales	Thiohalorhabdaceae	uncultured
Platygyra daedalea	7b3a492ece2121ead295c7676ddd0064	18	Proteobacteria	Alphaproteobacteria	Rhodovibrionales	Kiloniellaceae	uncultured
Platygyra daedalea	c1a21836681e9c865ff76b542184498e	30	Proteobacteria	Gammaproteobacteria	Gammaproteobacteria Incertae Sedis	Unknown Family	uncultured	uncultured organism
Platygyra daedalea	cf5e2f90cfa081804a66c8205ca14642	40	Proteobacteria	Alphaproteobacteria	Rhodospirillales	Rhodospirillaceae	uncultured
Platygyra daedalea	5f7076aae5c06209439d16569132c0f2	41	Proteobacteria	Gammaproteobacteria	Thiohalorhabdales	Thiohalorhabdaceae	uncultured	uncultured bacterium
Platygyra daedalea	112f1fcf5fc94c88b5675bfe63384b48	42	Proteobacteria	Gammaproteobacteria	Gammaproteobacteria Incertae Sedis	Unknown Family	uncultured
Platygyra daedalea	2ba727d6399e1a792f07e7f762fb7dac	15	Actinobacteria	Acidimicrobiia	Actinomarinales	uncultured	uncultured bacterium
Platygyra daedalea	62ed49eafd3025a46c821ec397d22d77	38	Verrucomicrobia	Verrucomicrobiae	Verrucomicrobiales	DEV007	uncultured bacterium
Platygyra daedalea	ec2e4dc54bfa062f7630cda8dcb0dcae	27	Bacteroidetes	Bacteroidia	Flavobacteriales	NS9 marine group	uncultured marine bacterium
Platygyra daedalea	81b8489be8496dcfcce0fb6b741dd8a7	13	Proteobacteria	Gammaproteobacteria	Vibrionales	Vibrionaceae	Vibrio
Platygyra daedalea	1a2f6e5084d6a682674976ebb2d25779	12	Proteobacteria	Gammaproteobacteria	Steroidobacterales	Woeseiaceae	Woeseia
Platygyra daedalea	30846d49d0291d0d409c460e6728b47e	22	Proteobacteria	Gammaproteobacteria	Steroidobacterales	Woeseiaceae	Woeseia
Platygyra daedalea	ab37d25693d84eb6a6cc60495deefa4c	46	Proteobacteria	Gammaproteobacteria	Steroidobacterales	Woeseiaceae	Woeseia	uncultured bacterium
Platygyra daedalea	80814aeecee35d62779e33d00c1dcdee	28	Acidobacteria	Subgroup 22	uncultured bacterium
Platygyra daedalea	deb410091b7894967e28e44190eca156	35	Bacteroidetes	Bacteroidia	Flavobacteriales	Crocinitomicaceae
Platygyra daedalea	3cedb7e6be026375ce0f9b1035eef743	5	Chlamydiae	Chlamydiae	Chlamydiales	Simkaniaceae
Platygyra daedalea	6381002ede07e81edd94f3c587ad7fd3	36	Gemmatimonadetes	BD2-11 terrestrial group	uncultured bacterium
Platygyra daedalea	f6478dce5d15e5ad67f0f6747c3f0581	10	Proteobacteria	Alphaproteobacteria	Tistrellales	Geminicoccaceae
Platygyra daedalea	6c60f4be8071914c95d22d798bd0217a	17	Proteobacteria	Alphaproteobacteria	Rhodobacterales	Rhodobacteraceae
Platygyra daedalea	a7a60b0044b7c5b5f8808bb8ea562e29	23	Proteobacteria	Gammaproteobacteria
Platygyra daedalea	8870591d30bf85990852e22536692e2a	24	Proteobacteria	Gammaproteobacteria	HOC36
Platygyra daedalea	8d46e4adca032c1be50d1dde7fe86461	29	Proteobacteria	Alphaproteobacteria	Rhodobacterales	Rhodobacteraceae
Platygyra daedalea	efdc0ca5be25fe6b918bf4c0791f0ea9	37	Proteobacteria	Gammaproteobacteria	OM182 clade
Platygyra daedalea	d1ed2b6459256eb6aaf9c59c0c5a2299	39	Proteobacteria	Alphaproteobacteria	Rhodobacterales	Rhodobacteraceae
Platygyra sinensis	c4471731c60a848a202d817c73d329ae	101	Proteobacteria	Gammaproteobacteria	Alteromonadales	Alteromonadaceae	Alteromonas
Platygyra sinensis	37964158e7e869f718d48b98456034a8	98	Proteobacteria	Gammaproteobacteria	Oceanospirillales	Endozoicomonadaceae	Endozoicomonas	uncultured bacterium
Platygyra sinensis	6b5b77a33dfccc459ce40665642960c0	99	Proteobacteria	Gammaproteobacteria	Oceanospirillales	Endozoicomonadaceae	Endozoicomonas	uncultured bacterium
Platygyra sinensis	9b96a288e66b63a1420dd120fe5e109c	100	Proteobacteria	Gammaproteobacteria	Vibrionales	Vibrionaceae	Vibrio
Pocillopora damicornis	cba1451799e8923e4237f8b37a115c6d	2	Proteobacteria	Gammaproteobacteria	Oceanospirillales	Endozoicomonadaceae	Endozoicomonas	uncultured bacterium
Pocillopora damicornis	456f0800357623e4255db9364f616f23	3	Proteobacteria	Gammaproteobacteria	Oceanospirillales	Endozoicomonadaceae	Endozoicomonas	uncultured bacterium
Pocillopora damicornis	f28883fc0dee764df6a8a7c7fa99312a	4	Proteobacteria	Gammaproteobacteria	Oceanospirillales	Endozoicomonadaceae	Endozoicomonas	uncultured bacterium
Pocillopora damicornis	ea500d5bbab72fd68ee3302d5a533366	5	Proteobacteria	Gammaproteobacteria	Oceanospirillales	Endozoicomonadaceae	Endozoicomonas
Pocillopora damicornis	d2caaf3bf2f90dd7529cec15045e6092	7	Proteobacteria	Gammaproteobacteria	Oceanospirillales	Endozoicomonadaceae	Endozoicomonas	uncultured bacterium
Pocillopora damicornis	7b28498f4445a24c2825de09d7341353	6	Proteobacteria	Alphaproteobacteria	Rhodobacterales	Rhodobacteraceae	Marivita
Porites annae	c24a2d11e9bd2a47838dcd934e064138	6	Bacteroidetes	Bacteroidia	Flavobacteriales	Cryomorphaceae	Cryomorpha	uncultured organism
Porites annae	73d1d991952e86aafb9d539fdc985941	5	Proteobacteria	Gammaproteobacteria	Oceanospirillales	Endozoicomonadaceae	Endozoicomonas	uncultured bacterium
Porites annae	2bae9bf890e397f7d03daf1c1a8bf282	7	Proteobacteria	Gammaproteobacteria	Oceanospirillales	Endozoicomonadaceae	Endozoicomonas	uncultured bacterium
Porites annae	b7e2ae7ce599348bbea10125a705cc32	8	Proteobacteria	Gammaproteobacteria	Oceanospirillales	Endozoicomonadaceae	Endozoicomonas	uncultured bacterium
Porites annae	703050e7a141d248e2a0ca46bf618f20	9	Bacteroidetes	Bacteroidia	Flavobacteriales	Flavobacteriaceae	Flavobacterium	uncultured bacterium
Porites annae	0f30d960259b39d497b1a3ea21dd74a8	12	Proteobacteria	Gammaproteobacteria	Steroidobacterales	Woeseiaceae	Woeseia
Porites annae	a86059a9995a1b9656e1ef36cf3ccbda	10	Proteobacteria	Alphaproteobacteria	Parvibaculales	PS1 clade
Porites annae	81fa6ad4f4a41627945426fe29d883a5	11	Proteobacteria	Gammaproteobacteria	Cellvibrionales
Porites lutea	d2caaf3bf2f90dd7529cec15045e6092	24	Proteobacteria	Gammaproteobacteria	Oceanospirillales	Endozoicomonadaceae	Endozoicomonas	uncultured bacterium
Porites lutea	11d7cdd58868971f88fcfbccc3b805c9	21	Proteobacteria	Gammaproteobacteria	Betaproteobacteriales	Burkholderiaceae	Pelomonas	uncultured bacterium
Porites lutea	d69c2fc094968fb97c66721aab11fad0	23	Proteobacteria	Gammaproteobacteria	Alteromonadales	Pseudoalteromonadaceae	Pseudoalteromonas
Porites lutea	7f41dddc60f65fef0a1458cbd8a68957	25	Proteobacteria	Gammaproteobacteria	Enterobacteriales	Enterobacteriaceae	Serratia
Porites lutea	1fcbcd7747b8431dffc2cdb80b25d5f3	20	Bacteroidetes	Bacteroidia	Cytophagales	Cyclobacteriaceae	uncultured
Porites lutea	81b8489be8496dcfcce0fb6b741dd8a7	22	Proteobacteria	Gammaproteobacteria	Vibrionales	Vibrionaceae	Vibrio
Stylophora pistillata	7f41dddc60f65fef0a1458cbd8a68957	6	Proteobacteria	Gammaproteobacteria	Enterobacteriales	Enterobacteriaceae	Serratia
Skeleton
Coral species	ASV identifier	ASVs nº	Phylum	Class	Order	Family	Genus	Species
Goniopora tenuidens	6a10c45e6e8221c5044acb1ac3e5cd4f	4	Proteobacteria	Gammaproteobacteria	Oceanospirillales	Pseudohongiellaceae	Pseudohongiella	uncultured gamma proteobacterium
Goniopora tenuidens	3fbfa1e33055f1322e0a533dba20414b	2	Proteobacteria	Alphaproteobacteria	Rhodospirillales	Magnetospiraceae	uncultured
Goniopora tenuidens	0476005e06c732ae1f6cc297c3672fc3	1	Proteobacteria	Alphaproteobacteria	uncultured	uncultured bacterium
Goniopora tenuidens	0b5503c063339764e85212311590fd34	3	Proteobacteria	Alphaproteobacteria	uncultured	uncultured bacterium
Goniopora tenuidens	8b3e9360f2a95ab7353afd3b6f32b529	5	Proteobacteria	Gammaproteobacteria	Cellvibrionales	Cellvibrionaceae
Goniopora tenuidens	466fdf87a48f4c32b41de88f5f40fcd3	6	Proteobacteria	Alphaproteobacteria
Goniopora tenuidens	c187a2dbe7bf65b9f6d6de0744468d4c	7	Proteobacteria	Alphaproteobacteria
Goniopora tenuidens	c6e8e0831f4c274a38bb6f608e48eccb	8	Proteobacteria	Alphaproteobacteria	Rhizobiales	Hyphomicrobiaceae
Montipora digitata	4b7e58ce546ca290ac16e615f7d189fb	2	Firmicutes	Bacilli	Bacillales	Bacillaceae	Bacillus
Montipora digitata	dce34a5f33689bffcc20abe03a6389d7	1	Proteobacteria	Deltaproteobacteria	Myxococcales	P3OB-42	uncultured organism
Paragoniastrea australensis	02d85be78de591be3a9a34390720966d	21	Proteobacteria	Alphaproteobacteria	Rhizobiales	Rhizobiaceae	Allorhizobium-Neorhizobium-Pararhizobium-Rhizobium
Paragoniastrea australensis	b87503e83452a29afbb6554eece544c2	2	Firmicutes	Clostridia	Clostridiales	Caldicoprobacteraceae	Caldicoprobacter	uncultured bacterium
Paragoniastrea australensis	beaf0c4e19fcda0872f45dc3fbb4739f	16	Proteobacteria	Deltaproteobacteria	Myxococcales	Haliangiaceae	Haliangium	uncultured bacterium
Paragoniastrea australensis	ffbebaa64e97447acf53ca957dee86aa	5	Proteobacteria	Gammaproteobacteria	Oceanospirillales	Pseudohongiellaceae	Pseudohongiella	uncultured bacterium
Paragoniastrea australensis	6a10c45e6e8221c5044acb1ac3e5cd4f	20	Proteobacteria	Gammaproteobacteria	Oceanospirillales	Pseudohongiellaceae	Pseudohongiella	uncultured gamma proteobacterium
Paragoniastrea australensis	cfc21d118a83044b78db7be1c6841b74	10	Spirochaetes	Spirochaetia	Spirochaetales	Spirochaetaceae	Spirochaeta 2	uncultured organism
Paragoniastrea australensis	b6f9bbe6f26cdfc2dd62eb454af385ee	7	Actinobacteria	Acidimicrobiia	Microtrichales	Microtrichaceae	Sva0996 marine group
Paragoniastrea australensis	18a3e54287114904c1af86a77f0e5571	1	Bacteroidetes	Bacteroidia	Cytophagales	Cyclobacteriaceae	uncultured	uncultured bacterium
Paragoniastrea australensis	7eaf8304eea0382a7969b3ede180a0ab	11	Proteobacteria	Alphaproteobacteria	Rhodovibrionales	Kiloniellaceae	uncultured	uncultured bacterium
Paragoniastrea australensis	f25d44855b0b8f718f5362d6b11f6cc9	3	Actinobacteria	Acidimicrobiia	Actinomarinales	uncultured	uncultured actinobacterium
Paragoniastrea australensis	7d383df221dac78e147a39c1cde523c5	8	Proteobacteria	Gammaproteobacteria	Steroidobacterales	Woeseiaceae	Woeseia	uncultured bacterium
Paragoniastrea australensis	728fc7d3f217b5406bc52d79e321df2b	13	Firmicutes	Clostridia	Clostridiales	Ruminococcaceae
Paragoniastrea australensis	2f697ff73b45167cfda42f154466a30d	14	Gemmatimonadetes	BD2-11 terrestrial group	uncultured bacterium
Paragoniastrea australensis	ae62edc636e38fc6b63865f0600a116a	6	Proteobacteria	Alphaproteobacteria
Paragoniastrea australensis	558fa67b08b04b1c570166786ea4e4ea	9	Proteobacteria	Gammaproteobacteria	HOC36	uncultured bacterium
Paragoniastrea australensis	b837ec6b31567742a97f997f85878d87	12	Proteobacteria	Gammaproteobacteria	KI89A clade	uncultured bacterium
Paragoniastrea australensis	590ed210789585102220e33f25ed0753	15	Proteobacteria	Alphaproteobacteria	Thalassobaculales	uncultured
Paragoniastrea australensis	0476005e06c732ae1f6cc297c3672fc3	17	Proteobacteria	Alphaproteobacteria	uncultured	uncultured bacterium
Paragoniastrea australensis	c187a2dbe7bf65b9f6d6de0744468d4c	18	Proteobacteria	Alphaproteobacteria
Paragoniastrea australensis	3b81e20fd69cf52eda70c5adafd27a6a	19	Proteobacteria	Alphaproteobacteria	Rhodovibrionales	Kiloniellaceae
Paragoniastrea australensis	79a63bd3eebb060a8eef43e626816706	4	Spirochaetes	Spirochaetia	Spirochaetales	Spirochaetaceae
Platygyra daedalea	6f53fac90e0d392a4579f137508dc2d7	1	Acidobacteria	Thermoanaerobaculia	Thermoanaerobaculales	Thermoanaerobaculaceae	Subgroup 23	uncultured bacterium
Platygyra daedalea	cf1e85948d0540539d9ef9bbc4a29744	2	Planctomycetes	Phycisphaerae	MSBL9	KCLunmb-38-53
Platygyra sinensis	3a0f28e7b09c851085e9c27735bef7c7	36	Proteobacteria	Alphaproteobacteria	Rhizobiales	Rhizobiaceae	Allorhizobium-Neorhizobium-Pararhizobium-Rhizobium
Platygyra sinensis	e2338712f8ff4a7bad00a47d3f284b3c	52	Proteobacteria	Alphaproteobacteria	Sneathiellales	Sneathiellaceae	AT-s3-44	uncultured bacterium
Platygyra sinensis	acb3db6049be9ba012969e3481d7eac1	61	Proteobacteria	Alphaproteobacteria	Sneathiellales	Sneathiellaceae	AT-s3-44
Platygyra sinensis	fd19bce8b151405ca5123d8d5a0f9121	91	Proteobacteria	Alphaproteobacteria	Sneathiellales	Sneathiellaceae	AT-s3-44	uncultured bacterium
Platygyra sinensis	ef811802fbc88a758cb3719464fc9855	93	Proteobacteria	Alphaproteobacteria	Rhizobiales	Rhizobiales Incertae Sedis	Bauldia	uncultured bacterium
Platygyra sinensis	793abe5db3285b0770f36eb876b20dfa	94	Proteobacteria	Alphaproteobacteria	Rhizobiales	Rhizobiales Incertae Sedis	Bauldia	uncultured bacterium
Platygyra sinensis	b1c331b86ddbf26ede3172a16cf9cb73	13	Proteobacteria	Alphaproteobacteria	Tistrellales	Geminicoccaceae	Candidatus Alysiosphaera
Platygyra sinensis	6e21a6495ae21c417a61786acfd76ee4	1	Bacteroidetes	Bacteroidia	Cytophagales	Amoebophilaceae	Candidatus Amoebophilus	uncultured bacterium
Platygyra sinensis	22e4f77291204ab7ad96ab50e210c87e	38	Bacteroidetes	Bacteroidia	Cytophagales	Amoebophilaceae	Candidatus Amoebophilus	uncultured bacterium
Platygyra sinensis	f69d66bce6ff460e72a64020166cc64e	66	Proteobacteria	Deltaproteobacteria	Desulfobacterales	Desulfobacteraceae	Candidatus Magnetoglobus	uncultured delta proteobacterium
Platygyra sinensis	d1e820e4c84494b443a46b32529cde03	4	Proteobacteria	Alphaproteobacteria	Rhodospirillales	Rhodopirillaceae	Defluviicoccus
Platygyra sinensis	4696d25a185b9d0ac27aa86cfd1d051f	97	Proteobacteria	Alphaproteobacteria	Rhodospirillales	Rhodopirillaceae	Defluviicoccus
Platygyra sinensis	718c95ac312002448019c2102b422387	48	Bacteroidetes	Bacteroidia	Cytophagales	Cyclobacteriaceae	Ekhidna
Platygyra sinensis	505a9eaccaa62432eaf2263fd8f2caa3	32	Proteobacteria	Alphaproteobacteria	Rhizobiales	Hyphomicrobiaceae	Filomicrobium	uncultured bacterium
Platygyra sinensis	e314753fd8b94040327679b1c3bd0148	77	Bacteroidetes	Bacteroidia	Cytophagales	Cyclobacteriaceae	Fulvivirga
Platygyra sinensis	beaf0c4e19fcda0872f45dc3fbb4739f	81	Proteobacteria	Deltaproteobacteria	Myxococcales	Haliangiaceae	Haliangium	uncultured bacterium
Platygyra sinensis	69fab13805743c4c6570b4c2f1175b9e	49	Proteobacteria	Alphaproteobacteria	Rhizobiales	Methyloligellaceae	Methyloceanibacter	uncultured bacterium
Platygyra sinensis	38702590a5ee8342034a849db3b9ba66	71	Proteobacteria	Alphaproteobacteria	Rhizobiales	Methyloligellaceae	Methyloceanibacter	uncultured bacterium
Platygyra sinensis	fcd2c2d60fcf2bc4342e599b87b212bb	65	Proteobacteria	Deltaproteobacteria	Myxococcales	Nannocystaceae	Nannocystis
Platygyra sinensis	9648f5cae185264250eb480bbcf222bb	95	Acidobacteria	Acidobacteriia	Solibacterales	Solibacteraceae (Subgroup 3)	PAUC26f
Platygyra sinensis	ada0f95367373ac37386d63e03dc32bd	85	Proteobacteria	Gammaproteobacteria	Vibrionales	Vibrionaceae	Photobacterium
Platygyra sinensis	d8bed62e46ef17d0b18a15ce01ca4c9e	72	Planctomycetes	Planctomycetacia	Planctomycetales	Rubinisphaeraceae	Planctomicrobium	uncultured bacterium
Platygyra sinensis	a5bafc6e15e9e62b15a3d512b3efc080	63	Bacteroidetes	Bacteroidia	Chitinophagales	Saprospiraceae	Portibacter
Platygyra sinensis	c461a149f5871ea7403b2f2ae5c8a3d8	25	Proteobacteria	Alphaproteobacteria	Rhizobiales	Xanthobacteraceae	Rhodoplanes
Platygyra sinensis	9f2ed4ab4a4c790b34cfc1bd26dc7396	21	Proteobacteria	Alphaproteobacteria	Rhodobacterales	Rhodobacteraceae	Ruegeria
Platygyra sinensis	5127608039be4bcd5f422b57630a793d	46	Bacteroidetes	Bacteroidia	Flavobacteriales	Schleiferiaceae	Schleiferia
Platygyra sinensis	ff81d8d280826582440b80bc4a7d3181	54	Acidobacteria	Thermoanaerobaculia	Thermoanaerobaculales	Thermoanaerobaculaceae	Subgroup 10	uncultured bacterium
Platygyra sinensis	ac352051509b063f63b27df269b92fd8	90	Acidobacteria	Thermoanaerobaculia	Thermoanaerobaculales	Thermoanaerobaculaceae	Subgroup 10
Platygyra sinensis	b0b549e21b6c9d38f274b960c1c9b4ff	17	Actinobacteria	Acidimicrobiia	Microtrichales	Microtrichaceae	Sva0996 marine group
Platygyra sinensis	56222ecd157f28775a5f5994fa055aeb	44	Actinobacteria	Acidimicrobiia	Microtrichales	Microtrichaceae	Sva0996 marine group	uncultured bacterium
Platygyra sinensis	6635812d44515db61e88966c703c5c98	11	Proteobacteria	Alphaproteobacteria	Rhodovibrionales	Kiloniellaceae	Tistlia
Platygyra sinensis	f00a2950f4dccc5c1f28903b75277105	41	Bacteroidetes	Bacteroidia	Flavobacteriales	Flavobacteriaceae	Ulvibacter
Platygyra sinensis	dfe414d68994141c309118b91beabc87	5	Actinobacteria	Acidimicrobiia	Microtrichales	Microtrichaceae	uncultured	uncultured bacterium
Platygyra sinensis	15ac4fbb8a629ea48a3044e3cbd257ab	16	Actinobacteria	Acidimicrobiia	Microtrichales	Ilumatobacteraceae	uncultured
Platygyra sinensis	15b44f740a192a775e8356e438d2d43c	8	Bacteroidetes	Bacteroidia	Chitinophagales	Saprospiraceae	uncultured	uncultured bacterium
Platygyra sinensis	5aa8f80ad7954498c561d7e7b8dfa87d	45	Bacteroidetes	Rhodothermia	Rhodothermales	Rhodothermaceae	uncultured
Platygyra sinensis	13695e2cc4a055408ed389d7dc524d28	64	Bacteroidetes	Rhodothermia	Rhodothermales	Rhodothermaceae	uncultured	uncultured bacterium
Platygyra sinensis	f27bfe2b8951939d6928915fcbd18cff	87	Bacteroidetes	Bacteroidia	Cytophagales	Cyclobacteriaceae	uncultured	uncultured bacterium
Platygyra sinensis	be807b0bdeaa343a64133f15eb746e5e	88	Planctomycetes	Phycisphaerae	Phycisphaerales	Phycisphaeraceae	uncultured
Platygyra sinensis	29378036224c4108e327be52d097fbb3	2	Proteobacteria	Alphaproteobacteria	Rhizobiales	Methyloligellaceae	uncultured
Platygyra sinensis	324f4a6c57c9e131e760d2d9d635d1de	15	Proteobacteria	Alphaproteobacteria	Rhizobiales	Methyloligellaceae	uncultured	uncultured bacterium
Platygyra sinensis	b2763fb663a2b69ba92d6a8fafed3327	18	Proteobacteria	Alphaproteobacteria	Rhizobiales	Methyloligellaceae	uncultured
Platygyra sinensis	a6af0ce4bac6f71a3f8b76f04e8898f2	29	Proteobacteria	Alphaproteobacteria	Rhizobiales	Rhizobiaceae	uncultured
Platygyra sinensis	1af0408ce8d752a1d5f88461946deff0	35	Proteobacteria	Alphaproteobacteria	Rhodovibrionales	Kiloniellaceae	uncultured	uncultured bacterium
Platygyra sinensis	a04dbf17788bea55766e838f58f30a15	43	Proteobacteria	Alphaproteobacteria	Rhodovibrionales	Kiloniellaceae	uncultured	uncultured bacterium
Platygyra sinensis	988798ad3a8e361622d7f847534dcbf4	47	Proteobacteria	Alphaproteobacteria	Rhodovibrionales	Kiloniellaceae	uncultured	uncultured bacterium
Platygyra sinensis	2832d56343fd0fcbb9775389e777de90	50	Proteobacteria	Alphaproteobacteria	Rhodovibrionales	Kiloniellaceae	uncultured	uncultured bacterium
Platygyra sinensis	cf5e2f90cfa081804a66c8205ca14642	69	Proteobacteria	Alphaproteobacteria	Rhodospirillales	Rhodospirillaceae	uncultured
Platygyra sinensis	85ecdc4b5a5c6fb74b290f6011e8ab53	7	Actinobacteria	Acidimicrobiia	Actinomarinales	uncultured	uncultured bacterium
Platygyra sinensis	994a460f8adbe80c2d788ce21c7aafb7	9	Actinobacteria	Acidimicrobiia	Actinomarinales	uncultured	uncultured bacterium
Platygyra sinensis	dddcbe0ec5b13533959c1ea4d97cbeb7	51	Actinobacteria	Acidimicrobiia	Actinomarinales	uncultured	uncultured bacterium
Platygyra sinensis	2c34aa08f7e03448eab983f86c95c80a	6	Proteobacteria	Gammaproteobacteria	Steroidobacterales	Woeseiaceae	Woeseia	uncultured bacterium
Platygyra sinensis	7d383df221dac78e147a39c1cde523c5	10	Proteobacteria	Gammaproteobacteria	Steroidobacterales	Woeseiaceae	Woeseia	uncultured bacterium
Platygyra sinensis	0f30d960259b39d497b1a3ea21dd74a8	14	Proteobacteria	Gammaproteobacteria	Steroidobacterales	Woeseiaceae	Woeseia
Platygyra sinensis	94b30b04b63f2217fb3792d815bbc415	34	Proteobacteria	Gammaproteobacteria	Steroidobacterales	Woeseiaceae	Woeseia
Platygyra sinensis	629d34fca1bfd76b658d07d30f17721c	30	Acidobacteria	Subgroup 26	uncultured bacterium
Platygyra sinensis	80814aeecee35d62779e33d00c1dcdee	60	Acidobacteria	Subgroup 22	uncultured bacterium
Platygyra sinensis	ef212845c9e1070fa75787ea7574b2af	3	Actinobacteria	Acidimicrobiia	Actinomarinales	uncultured
Platygyra sinensis	f647a61ef2a940e55c43e77312f86232	33	Actinobacteria	Acidimicrobiia	Actinomarinales	uncultured
Platygyra sinensis	239ba548ffe347d6e8cec0712ed67207	79	Actinobacteria	Thermoleophilia	Gaiellales	uncultured
Platygyra sinensis	2c120b688b2b9e96136b6adb4d7a8413	22	Bacteroidetes	Bacteroidia	Flavobacteriales	Flavobacteriaceae
Platygyra sinensis	fc11d274cb51e1aaecc6f127edbf8bc0	73	Bacteroidetes	Ignavibacteria	OPB56
Platygyra sinensis	f304959ae811820b73e01361c178cdb9	28	Gemmatimonadetes	BD2-11 terrestrial group	uncultured bacterium
Platygyra sinensis	847d17744dc6f194fa7de39f9b9e7617	68	Gemmatimonadetes	PAUC43f marine benthic group	uncultured bacterium
Platygyra sinensis	45faf6311ff3d93bf61b03182f96b488	80	Gemmatimonadetes	BD2-11 terrestrial group	uncultured bacterium
Platygyra sinensis	82725979fed2129d68a06c539c3ef755	84	Gemmatimonadetes	BD2-11 terrestrial group	uncultured bacterium
Platygyra sinensis	3a6ce31f322d4427c9c59d8b480358fd	12	Proteobacteria	Alphaproteobacteria	Rhizobiales	Rhizobiaceae
Platygyra sinensis	0476005e06c732ae1f6cc297c3672fc3	19	Proteobacteria	Alphaproteobacteria	uncultured	uncultured bacterium
Platygyra sinensis	2538aba1c282bba949502e08437f9046	20	Proteobacteria	Alphaproteobacteria	Rhizobiales
Platygyra sinensis	c6e8e0831f4c274a38bb6f608e48eccb	23	Proteobacteria	Alphaproteobacteria	Rhizobiales	Hyphomicrobiaceae
Platygyra sinensis	ce770ad0cbed845c8f11594071cabb19	24	Proteobacteria	Alphaproteobacteria	Rhizobiales
Platygyra sinensis	dc0a7e45d672925aac41eebf877aaee7	26	Proteobacteria	Alphaproteobacteria	uncultured	uncultured organism
Platygyra sinensis	659a2601949d0eecadb4cef59c3b69c8	27	Proteobacteria	Alphaproteobacteria	uncultured
Platygyra sinensis	134bfad6c8616f83f8e2a054605e7075	31	Proteobacteria	Alphaproteobacteria	Rhodovibrionales	Kiloniellaceae
Platygyra sinensis	64de509f9900d07ab955060b44cb7879	37	Proteobacteria	Alphaproteobacteria	Rhizobiales	Rhizobiaceae
Platygyra sinensis	3a212686c2c163951627d39653ddfeca	39	Proteobacteria	Alphaproteobacteria
Platygyra sinensis	84fbc6cdee196021bb01ae42bda8dc2b	40	Proteobacteria	Gammaproteobacteria	JTB23	uncultured bacterium
Platygyra sinensis	09f53327662116c347ad44e36c71b9de	42	Proteobacteria	Gammaproteobacteria	KI89A clade	uncultured bacterium
Platygyra sinensis	36609f42f681ea3616aaaddfbf5b0e07	53	Proteobacteria	Gammaproteobacteria
Platygyra sinensis	e8068618f541ed51e91869b0ecdfc68e	55	Proteobacteria	Alphaproteobacteria
Platygyra sinensis	ce4b06af888bcb82fa4b5ee47bc5eff6	56	Proteobacteria	Deltaproteobacteria	NB1-j	uncultured bacterium
Platygyra sinensis	8dc47a367c04502126108889a2ad2a81	57	Proteobacteria	Deltaproteobacteria	NB1-j
Platygyra sinensis	c187a2dbe7bf65b9f6d6de0744468d4c	58	Proteobacteria	Alphaproteobacteria
Platygyra sinensis	3cf8c2424c188fcd19534ba0d559a4ca	59	Proteobacteria	Gammaproteobacteria	EPR3968-O8a-Bc78	uncultured bacterium
Platygyra sinensis	e5743699abb2aaf5aedac6b3f5885d4c	62	Proteobacteria	Alphaproteobacteria	Rhodovibrionales	Kiloniellaceae
Platygyra sinensis	2bae28fa708d50326195d5f7e8ea4908	67	Proteobacteria	Alphaproteobacteria	Rhizobiales	Rhizobiaceae
Platygyra sinensis	026bd97f6ecd8beba8ca7440878c56b5	70	Proteobacteria	Alphaproteobacteria	Rhizobiales
Platygyra sinensis	fd10215e6f88cc4606dd3fe7c679a376	74	Proteobacteria	Alphaproteobacteria	Rhizobiales
Platygyra sinensis	6127398c9a68bfb479ede9e496cd9960	75	Proteobacteria	Deltaproteobacteria	NB1-j	uncultured bacterium
Platygyra sinensis	ed51ee7035e6662a1ff83666e64f4ad5	76	Proteobacteria	Gammaproteobacteria	KI89A clade
Platygyra sinensis	59129509c5852add69124beadee776d0	78	Proteobacteria	Gammaproteobacteria	Chromatiales	Chromatiaceae
Platygyra sinensis	5135dd074ce49fc37ea935c9cba6140f	82	Proteobacteria	Gammaproteobacteria	Ga0077536	uncultured bacterium
Platygyra sinensis	168834d6828a92ba2b2de908f6e91846	83	Proteobacteria	Alphaproteobacteria	Rhodovibrionales	Kiloniellaceae
Platygyra sinensis	7e4c078f7af6015a187b49b32bf704ff	86	Proteobacteria	Alphaproteobacteria	Caulobacterales
Platygyra sinensis	0348fc800273af65c89b8f6afad4b926	89	Proteobacteria	Deltaproteobacteria	NB1-j
Platygyra sinensis	5311c62faa22ccaa1af539bd3d4e5303	92	Proteobacteria	Gammaproteobacteria
Platygyra sinensis	e87cfe1bb4a54dc7e634b027d9d90547	96	Proteobacteria	Deltaproteobacteria	NB1-j
Pocillopora damicornis	6e21a6495ae21c417a61786acfd76ee4	1	Bacteroidetes	Bacteroidia	Cytophagales	Amoebophilaceae	Candidatus Amoebophilus	uncultured bacterium
Porites annae	abd1646354b746c64e87022a8dfb6588	1	Bacteroidetes	Bacteroidia	Cytophagales	Cyclobacteriaceae	Fulvivirga	uncultured bacterium
Porites annae	0eec3e48e0824b6906054d4f31a0f837	4	Spirochaetes	Spirochaetia	Spirochaetales	Spirochaetaceae	Spirochaeta 2	uncultured organism
Porites annae	67aed7d8f2d842f456ee14623db26c0d	2	Proteobacteria	Alphaproteobacteria	Caulobacterales	Parvularculaceae	uncultured
Porites annae	551491e0861fff78942582bdfd2faaa9	3	Proteobacteria	Alphaproteobacteria	Rhodobacterales	Rhodobacteraceae
Porites lutea	0b90c38e6a9f575505ef44b3b2b190d6	9	Spirochaetes	Spirochaetia	Spirochaetales	Spirochaetaceae	Alkalispirochaeta	uncultured organism
Porites lutea	5581fa60bae1b89c06e057c6f2829525	13	Spirochaetes	Spirochaetia	Spirochaetales	Spirochaetaceae	Alkalispirochaeta	uncultured organism
Porites lutea	6e21a6495ae21c417a61786acfd76ee4	1	Bacteroidetes	Bacteroidia	Cytophagales	Amoebophilaceae	Candidatus Amoebophilus	uncultured bacterium
Porites lutea	27974ab12e1eb03928c25620b078f949	3	Proteobacteria	Alphaproteobacteria	Rhizobiales	Xanthobacteraceae	Rhodoplanes
Porites lutea	cfc21d118a83044b78db7be1c6841b74	8	Spirochaetes	Spirochaetia	Spirochaetales	Spirochaetaceae	Spirochaeta 2	uncultured organism
Porites lutea	16c1b9fa4959da7a891cb96d51a337f5	12	Spirochaetes	Spirochaetia	Spirochaetales	Spirochaetaceae	Spirochaeta 2
Porites lutea	3f86763d8bf21749933458a845df4f1b	17	Spirochaetes	Spirochaetia	Spirochaetales	Spirochaetaceae	Spirochaeta 2	uncultured organism
Porites lutea	89e04088033dc18775bcf7134de57b2f	16	Firmicutes	Clostridia	Clostridiales	Christensenellaceae	uncultured	uncultured bacterium
Porites lutea	e0bc81816be7027602958ffb5cbf0689	19	Bacteroidetes	Bacteroidia	Bacteroidales	Bacteroidetes BD2-2	uncultured bacterium
Porites lutea	a3e25215662be7c12ba57b17066f9637	2	Proteobacteria	Gammaproteobacteria	Steroidobacterales	Woeseiaceae	Woeseia
Porites lutea	36eba7ea9b71c45a53b714cab99172eb	14	Bacteroidetes	Chlorobia	Chlorobiales	Chlorobiaceae
Porites lutea	ee4d86aa0125cece51b5d5a25557e0d2	15	Bacteroidetes	Bacteroidia	Bacteroidales	Prolixibacteraceae
Porites lutea	34fa863e5cb366d119c111b8a75dee82	18	Planctomycetes	Phycisphaerae	mle1-8	uncultured organism
Porites lutea	a7af6472dc4a41b6e1d99bb0a94e33a2	4	Proteobacteria	Alphaproteobacteria
Porites lutea	59129509c5852add69124beadee776d0	5	Proteobacteria	Gammaproteobacteria	Chromatiales	Chromatiaceae
Porites lutea	ee0bddf0cd8da9b111e2b842198f9957	6	Proteobacteria	Alphaproteobacteria
Porites lutea	2538aba1c282bba949502e08437f9046	7	Proteobacteria	Alphaproteobacteria	Rhizobiales
Porites lutea	0476005e06c732ae1f6cc297c3672fc3	10	Proteobacteria	Alphaproteobacteria	uncultured	uncultured bacterium
Porites lutea	590ed210789585102220e33f25ed0753	11	Proteobacteria	Alphaproteobacteria	Thalassobaculales	uncultured
Stylophora pistillata	6e21a6495ae21c417a61786acfd76ee4	1	Bacteroidetes	Bacteroidia	Cytophagales	Amoebophilaceae	Candidatus Amoebophilus	uncultured bacterium
Stylophora pistillata	f639670cb55d79bae2e49268207bbd51	2	Bacteroidetes	Bacteroidia	Cytophagales	Amoebophilaceae	Candidatus Amoebophilus	uncultured bacterium
Stylophora pistillata	522e09ef820ec33e36c19785b497ac82	4	Proteobacteria	Gammaproteobacteria	Oceanospirillales	Endozoicomonadaceae	Endozoicomonas	uncultured bacterium
Stylophora pistillata	190db29e9db8954066e29ed58a6acbca	3	Proteobacteria	Gammaproteobacteria	Alteromonadales	Pseudoalteromonadaceae	Psychrosphaera
Stylophora pistillata	9fecca368b214f6b009f74ac000bde33	5	Proteobacteria	Gammaproteobacteria	Betaproteobacteriales	Hydrogenophilaceae	Tepidiphilus	uncultured bacterium
